# Supplementary material for: Konzepte für eine strukturierte Patientenübergabe
Source: Springer Nature journal article supplement (doi:10.1007/s10049-019-0599-8), 2019-05-09
Supplement: MOESM1 [file 16713480]

**Große Literatur-Sammlung: Übergabe**

1. Aase K, Soyland E, Hansen BS (2011): A Standardized Patient Handover Process: Perceptions and Functioning. Safety Science Monitoring 15(2):1-9
2. Adams HA, Trentz O (2007): Die Erstversorgung des polytraumatisierten Patienten. Anästh Intensivmed 48:73-96
3. Alessandrini H, Oberladstätter D, Trimmel H, Jahn B, Baubin M (2012): NACA-Scoringsystem. Notfall Rettungsmed 15:42-50
4. Andersen HB, Siemsen IMD, Petersen LF, Nielsen J, Östergard D (2015): Development and validation of a taxonomy of adverse handover events in hospital settings. Cogn Tech Work 17:79-87
5. Australian and New Zealand College of Anaesthetists (ANZCA)(2013): Statement on the Handover Responsibilities of the Anaesthetist. <https://anzca.edu.au./documents/ps-53-2013-Statement-on-the-Handover-Responsibility.pdf>
6. Australasian College for Emergency Medicine: Guideline on Clinical Handover in the Emergency Department. http://educationresource.bhs.org.au/library/file/388/G36/Guideline_on_clinical_Handover_in_the_ED.pdf
7. Australian Commission on Safety and Quality in Health Care (2009): ISBAR revisited: Identifying and Solving Barriers to effective clinical handover in inter-hospital transfer. https://www.safetyandquality.gov.au/ publications/isbar-revisited-identifying-and-solving-barriers-to-effective-clinical-handover-in-inter-hospital-transfer
8. Australian Commission for Safety and Quality in Health Care (ACSQHC): Implementation toolkit for clinical handover improvement (2011). [http://www.safetyandquality.gov.au/our-work/clinical-communications/ clinical-handover/implementation-toolkit-for-clinical-handover-improvement-and-resource-portal](http://www.safetyandquality.gov.au/our-work/clinical-communications/%20clinical-handover/implementation-toolkit-for-clinical-handover-improvement-and-resource-portal)
9. Australian Commission on Safety and Quality in Health Care: Standard 6 – Clinical Handover. Safety and Quality Improvement Guide. [https://www.safetyandquality.gov.au/wp-content/uploads/2012/10/ Standard6_October_2012_WEB.pdf](https://www.safetyandquality.gov.au/wp-content/uploads/2012/10/%20Standard6_October_2012_WEB.pdf)
10. Australian Medical Association and Office of Safety and Quality in Healthcare (2012) Clinical Handover Symposium- November 2012: Catchpole K: Human Factors in Clinical Handovers. ww2.health.wa.gov.au/Articles/A_E/Clinical-handover
11. Balhara KS, Peterson SM, Moheb Elabd M, Regan L, Anton X, Al-Natour BA, Hsieh Y-H, Scheulen J, Stewart de Ramirez SA (2018): Implementing standardized, inter-unit communication in an international setting: handoff of patients from emergency medicine to internal medicine. Intern Emerg Med 13:385-395
12. Barzen S, Schweigkofler U, Hoffmann R (2016): Präklinik und Klinik: Treffen zwei Welten aufeinander? Rettungsdienst 39:1184-1189
13. Bashkin O, Caspi S, Halogoa R, Mizrahi S, Stalnikowicz R (2015): Organizational factors affecting length of stay in the emergency department: initial observational study. Israel Journal of Health Policy Research 4:38. D=I 10.1186/s13584-015-0035-6
14. Bayeff-Filloff M (2013): Kap. 28.1 Herausforderungen an der Nahtstelle zur Präklinik. in: Neumayr A, Schinnerl A, Baubin M: Qualitätsmanagement im prähospitalen Notarztwesen. Springer Berlin Heidel Berg New York 2013
15. Bayeff-Filloff M (2013): Kap. 28.2.4 Übergabe. in: Neumayr A, Schinnerl A, Baubin M: Qualitätsmanagement im prähospitalen Notarztwesen. Springer Berlin Heidel Berg New York 2013
16. Bayeff-Filloff M, Anding K, Lackner CK (2001): Schnittstelle Rettungsdienst und Klinik. Nebeneinander -> Miteinander. Notfall Rettungsmed 7:515-518
17. Beaumont ST, Ewens B, Wilcox F, Reid G (2018): A collaborative approach to the implementation of a structured clinical handover tool (iSoBAR), within a hospital setting in metropolitan Western Australia: A mixed methods study. Nurse Educ Pract 33:107-113
18. Beckenkamp T (2016): Eine neue Perspektive. intensiv 24:324-329
19. Beinersdorf A (2007): Der Informationsverlust bei der Patientenverlegung. intensiv 15:268-273
20. Bernhard M, Trautwein S, Stepan R, Zahn P, Greim CA, Gries A (2014): Notärztliche Einschätzung der klinischen Weiterversorgung von Notfallpatienten. Anaesthesist 63:394-400
21. Bost N, Crilly J, Wallis M, Patterson E, Chaboyer W (2010): Clinical handover of patients arriving by ambulance to the emergency department – a literature review. Int Emerg Nurs 18(4):210-220. Doi 10.1016/j.ienj.2009.11.006
22. Braecklein M (2008): Mobile Datenkommunikation im Rettungsdienst. Notarzt 24:13-17
23. Brammen D, Bleicher W, Branitzki P, Castellanos P, Messelken M, Pollwein B, Prause A, Röhrig R (2010): Spezielle Empfehlungen und Anforderungen zur Implementierung von DV-Systemen in der Notfallmedizin. Anästh Intensivmed 51:119-26
24. Burghofer K, Lackner CK (2009): Die Safe:Trac-Kursreihe der DGU zur Patientensicherheit. Unfallchirurg 112:753-755
25. Burghofer K, Lackner CK (2010): Kommunikation. Notfall Rettungsmed 13:363-367
26. Burghofer K, Lackner CK (2012): Risikomanagement und Human Factor in der Akutmedizin. Notfall Rettungsmed 15:9-15
27. Busch H-J, Schmid B, Michels G, Wolfrum S (2018): Strukturen der Akutmedizin. Med Klin Intensivmed Notfallmed 113:260-266
28. Buschhorn HM, Strout TD, Sholl JM, Baumann MR (2013): Emergency medical services triage using the emergency severity index: is it reliable and valid? J Emerg Nurses 39(5):e55-63. Doi 10.1016/j.jen.2011.11.003
29. Chan TM, Wallner C, Swoboda TK, Leone KA, Kessler C (2012): Assessing Interpersonal and Communication Skills in Emergency Medicine. Academic Emergency Medicine 19:1390-1402. Doi 10.1111/acem.12030
30. Clinical Quality & Patient Safety Unit, QAS (2012): Clinical practice Procedures: Clinical Handover. https://ambulance.qld.gov.au/\docs\clinical\cpp\CPP_clinicalhandover.pdf
31. Coburn M: BDAktuell-DGAInfo (2016): Qualitätsindikatoren Anästhesiologie 2015. Anästh Intensivmed 57:219-30
32. Colvin MO, Eisen LA, Gong NG (2016): Improving the Patient Handoff Process in the Intensive Care Unit: Keys to Reducing Errors and Improving Outcomes. Semin Respir Crit Care Med 37:96-106
33. Coughlan JJ, Mross T, Gul F, Abbott A, Say R, Nawaz A, O´Brien C, Liston R (2018): Implementing an electronic clinical handover system in a university teaching hospital. Ir J Med Sci 187:309-312
34. Dawson S, King L, Grantham H (2013): Review article: Improving the hospital clinical handover between paramedics and emergency department staff in the deteriorating patient. Emerg Med Australas 25(5):393-405. Doi 10.1111/1742-6723-12120
35. De Meester K, Verspuy M, Monsieurs KG, van Bogaert P (2013): SBAR improves nurse-physician communication and reduces unexspected death: a pre- and postintervention study. Resuscitation 84:1192-6
36. Ebben RHA, van Grunsven PM, Moors ML, Aldenhoven P, de Vaan J, van Hout R, van Achterberg T, Vloet LCM (2015): A tailored e-learning program to improve handover in the chain of emergency care: a pre-test post-test study. Scandinavian Journal of Trauma, Resuscitation and Emergency Medicine 23:33-43. DOI 101186/s13049-015-0113-3
37. Eder PA, Dormann H, Krämer RM, Lödel SK, Shammas L, Rashid A (2018): Telemedizinische Voranmeldung durch den Rettungsdienst bei Schwerverletzten. Notfall Rettungsmed doi.org/10.1007/s10049/018-0436-5
38. Fahim Yegane SA, Shahrami A, Hatamabadi HR, Hosseini-Zijoud SM (2017): Clinical Information Transfer between EMS Staff and Emergency Medicine Assistants during Handover of Trauma Patients. Prehosp Disaster Med 32(5):541-547. Doi 10.1017.S1049023X17006562
39. Farhan M, Brown R, Woloshynowych M, Vincent C (2012): The ABC of handover: a qualitative study to develop a new tool for handover in the emergency department. Emerg Med J 29:941-946
40. Ferorelli D, Giandola T, Laterza M, Solarino B, Pezzola A, Zotti F, Dell´Erba A (2017): Handover checklist: testing a standardization process in an Italian hospital. Risk Management and Health Care Policy 10:87-93
41. Fitzpatrick D, Maxwell D, Craigie A (2018): The feasibility, acceptability and preliminary testing of a novel, low-tech intervention to improve pre-hospital data recording for pre-alert and handover to the Emergency Department. BMC Emergency Medicine 18:16-25. Doi 10.1186/s12873-018-0168-3
42. Fitzpatrick D, McKenna M, Duncan EAS, Laird C, Lyon R, Corfield A (2018): Critcomms: a national cross-sectional questionnaire based study to investigate prehospital handover practices between ambulance clinicians and specialist prehospital teams in Scotland. Scandinavian Journal of Trauma, Resuscitation and Emergency Medicine 26:45-55. doi 10.1186/s13049-018-0512-3
43. Flanigan M, Heilman JA, Johnson T, Yarris LM (2015): Teaching and Assessing ED Handoffs: A Quantitative Study Exploring Resident, Attending, and Nurse Perceptions. West J Emerg Med XVI/6:823-829. Doi 10.5811/westjem.2015.8.27278
44. Fleming A (2013): Intensivtransport. Anästh Intensivmed 54:59-68
45. Flynn D, Francis R, Robalino S, Lally J, Snooks H, Rodgers H, McClelland G, Ford GA, Price C (2017): A review of enhanced paramedic roles during and after hospital handover of stroke, myocardial infarction and trauma patients. BMC Emergency Medicine 17:5-17. DOI 10.1186/s12873-017-0118-5
46. Friedberg S (2018): Sprechen wir eine gemeinsame Sprache? Rettungs-Magazin September/Oktober:28-33
47. Geelhoed G(2013): Handover in Western Australia. ww2.health.wa.gov.au/Articles/A_E/Clinical-handover
48. Gemeinsamer Bundesausschuss -GBA- (2018): Beschluss des Gemeinsamen Bundesausschusses über die Erstfassung der Regelungen zu einem gestuften System von Notfallstrukturen in Krankenhäusern gemäß § 136c Absatz 4 SGB V. https://www.g-ba.de/downloads/62-492-1598/Not-Kra-R_2018-04-19_iK2018-05-19.pdf
49. Giske T, Nese Melas S, Einarsen KA (2017): The art of oral handovers: A participant observational study by undergraduate students in a hospital setting. J Clin Nurs DOI: 10.1111/jocn.14177
50. Goldberg SA, Porat A, Strother CG, Lim NQ, Wijeratne HR, Sanchez G, Munjal KG (2017): Quantitative Analysis of the content of EMS Handoff of Critically Ill and Injured Patients to the Emergency Department. Prehosp Emerg Care 21(1):14-17. Doi 10.1080/1090303127.2016.1194930
51. Gordon M, Hill E, Stojan JN, Daniel M (2018): Educational Interventions to Improve Handover in Health Care: An Updated Systematic Review. Acad Med 93:1234-1244
52. Government of Western Australia, Department of Health: Clinical Handover Policy. ww2.health.wa.gov.au/Articles/A_E/Clinical-handover
53. Government of Western Australia, Department of Health (2012): Handover. <http://intranet.health.wa.gov.au/orqh/handover>
54. Government of Western Australia, Department of Health: WA Allied Health Clinical Handover Guideline and Form. Clinical Handover Policy (2018) http://www.health.wa.gov.au/circularsnew/pdfs/13404.pdf
55. Gräff I, Wittamnn M, Dahmen A, Goldschmidt B, Tenzer D, Glien P, Drehsen L, Link N, Hoeft A, Baumgarten G (2011): Prozessoptimierung im interdisziplinären Notfallzentrum. Notfall Rettungsmed 14:202-210
56. Greiner F, Brammen D, Kulla M, Walcher F, Erdmann B (2018): Standardisierte Erhebung von Vorstellungsgründen in der Notaufnahme. Med Klin Intensivmed Notfallmed 113:115-123
57. Gries A (2010): Zentrale interdisziplinäre Notaufnahme. Anästh Intensivmed 51:338-345
58. Hannaford N, Mandel C, Crock C, Magrabi F, Ong M, Allen S, Schultz T (2013) Learning from incident reports in the Australian medical imaging setting: handover and communication errors. Br J Radiol 86:2012;0336
59. Hansis ML (2001): Koordinationsdefizite als Ursache vorgeworfener Behandlungsfehler. DÄB 98:A2035-2040
60. Harmsen AMK, Geeraedts Jr LMG, Giannakopoulos GF, Terra M, Christians HMT, Mokkink LB, Bloemers FW (2017): National consensus on communication in prehospital trauma care, the DENIM study. Scandinavian Journal of Trauma, Resuscitation and Emergency Medicine 25:67-77. DOI 10.1186/s13049-017-0414-9
61. Health Systems Institute: Verifying and Improving the Patient Handoff. <https://www.yumpu.com/en/document/view/33907926/new-physics-in-b-s-sbar-s>
62. Heilman JA, Flanigan M, Nelson A, Johnson T, Yarris LM (2016): Adapting the I-PASS Handoff Program for Emergency Department Inter-Shift Handoffs. West J Emerg Med XVII/6:756-761. Doi 10.5811/westjem.2016.9.30574
63. Helm M, Bitzl A, Klinger S, Lefering R, Lampl L, Kulla M (2013): Das TraumaRegister DGU als Basis eines medizinischen Qualitätsmanagement. Unfallchirurg 116:624-632
64. Hieber M (2018): Pflegeübergabe: Die Informationsweitergabe muss geübt werden. Heilberufe 70:7-8
65. Höchter DJ, von Dossow V (2018): Strukturierte Patientenübergabe. Intensivmedizin up2date 14 (1):75-84
66. Hörster AC, Kulla M, Brammen D, Lefering R (2018): Potenzial zur Erfassung von international etablierten Qualitätsindikatoren durch ein nationales Notaufnahmeregister. Med Klin Intensivmed Notmed 113:409-417
67. Hohenegger M: Vom Rettungsdienst in die Klinik. Heilberufe 70:7-8
68. Hovenkamp GT, Olgers TJ, Wortel RR, Noltes ME, Derksen B, ter Maaten JC (2018): The satisfaction regarding handovers between ambulance and emergency department nurses: an observational study. Scandinavian Journal of Trauma, Resuscitation and Emergency Medicine 26:78-83. Doi.org/10.1186/s13049-018-0545-7
69. Hullick C, Conway J, Higgins I, Hewitt J, Dilworth S, Holliday E, Attia J (2016): Emergency department transfers and hospital admissions from residential aged care facilities: a controlled pre-post design study. BMC Geriatrics 16:102-111
70. Iedema R, Ball C, Daly B, Young J, Middelton PM, Foster-Curry C, Jones M, Hoy S, Comerford D (2012): Design and trial of a new ambulance-to-emergency department handover protocol: “IMIST-AMBO”. BMJ Qual Saf 21(8):627-633. Doi 10.1136/bmjqs-2011-000766
71. Jantzen T, Dreyer A, Fischer M, Messelken M, Müller M, Seewald S, Wnent J, Gräsner JT (2001) Das innerklinische Notfallprotokoll. Anästh Intensivmed 52:S723-6
72. Jenkin A, Abelson-Mitchell N, Cooper S (2007): Patient handover: a time for change? Accid Emerg Nurs 15(3):141-147. Doi 10.1016/j.aaen.2007.04.004
73. Jensen SM, Lippert A, Östergard D (2013): Handover of patients: a topical review of ambulance crew to emergency department handover. Acta Anaesthesiologica Scand 57(3):964-970. Doi 10.1111/aas.12125
74. Johnson JK, Farnan JM, Barach hP, Hesselink G, Wollersheim H, Pijnenborg L, Kalkman C, Arora VM (2012): BMJ Qual Saf 21:i97-i105. Doi 10.1136/bmjqs-2012-001215
75. Kalyani MN, Fereidouni Z, Sarvestani RS, Shirazi ZH, Taghinezhad A (2017): Perspectives of Patient Handover among Paramedics and Emergency Department members; a Qualitative Study. Emergency 5(1):e76
76. Ka-yee, HJ (2016): Improving clinical handover: Development of a web-based intensive care unit consultation system with structured reply generation. BMJ Qual Imp Reports 2016; doi: 10.1136.bmjquality u210292.w4180
77. Kessler C, Shakeel F, Herrn GH et al. (2013): An Algorithm for Transition of Care in the Emergency Department. Academic Emergency Medicine 20:605-610. doi 10.1111/acem.12153
78. Kiefl D, Friedrich L, Bonifer P (2014): Strukturierte Übergabe: ein Konzept für vollständigen Informationsfluss und Mitarbeiterzufriedenheit. Notfall Rettungsmed Suppl 1:9
79. Klinger S, Kulla M, Lampl L, Helm M (2012): Praktische Umsetzung des Kerndatensatzes Notaufnahme der DIVI. Notfall Rettungsmed 15:510-515
80. Knutsen GO, Fredriksen K (2013): Usage of documented pre-hospital observations in secondary care: a questionnaire study and retrospective comparison of records. Scandinavian Journal of Trauma, Resuscitation and Emergency Medicine 21:13-19
81. Kreimeier U, Sefrin P (2012): Schnittstellen in der Notfallmedizin. Notfall Rettungsmed 15:287-288
82. Krüger A, Gillmann B, Hardt C, Döring R, Beckers SK, Roissaint R (2009): Vermittlung von „soft skills“ für Belastungssituationen. Anaesthesist 58:582-588
83. Kühne CA, Ruchholtz S, Sauerland s, et al. (2004): Personelle und strukturelle Voraussetzungen der Schockraumbehandlung Polytraumatisierter. Eine systematische Literaturübersicht. Unfallchirurg 107:851-861
84. Kulla M, Baacke M, Schöpke T, Walcher F, Ballschk A, Röhrig R, Ahlbrandt J, Helm M, Lampl L, Bernhard M, Brammen D (2014): Kerndatensatz „Notaufnahme“ der DIVI. Notfall Rettungsmed 17:671-681
85. Kulla M, Friess M, Schellinger PD, Harth A, Busse O, Walcher F, Helm M (2015): Berücksichtigung von Leitlinien, Empfehlungen und Qualifikationsindikatoren zur Schlaganfalltherapie im Datensatz Notaufnahme der DIVI. Nervenarzt 86:1538-1548
86. Kulla M, Goertler M, Somasundaram R, Walcher F, Greiner F, Lefering R, Wrede C, Rubak K, Hörster A, Baacke M, Erdmann B, Dormann H (2016): Bewertung von Qualitätsindikatoren für die Notaufnahme. Notfall Rettungsmed 19:646-656
87. Kulla M, Röhrig R, Helm M, Bernhard M, Gries A, Lefering R, Walcher F (2014): Nationaler Datensatz „Notaufnahme“. Anaesthesist 63:243-252
88. Lackner CK, Altemeyer K-H (2005): Quo vadis NACA-Score? Notfall Rettungsmed 8:85-86
89. Laue F, Ramadanov N, Matthes G (2019): Schockraummanagement beim Schwerverletzten. Notfall Rettungsmed doi 10.1007/s10049-018-0552-2
90. Lazarovici M, Trentzsch H, Prückner S (2017): Human Factors in der Medizin. Anaesthesist 66:63-80
91. Lee S, Jordan J, Hern HG, Kessler C, Promes S, Krzyzaniak S, Stettner T, Druck J (2017): Transition of Care Practices from Emergency Department to Inpatient: Survey Data and Development of Algorithm. West J Emerg Med XVIII/1:86-92. Doi 10.5811/westjem.2016.9.31004
92. Leinung D, Winter D, Pohl A, Beardi J, Wagenknecht A, et al. (2014): Evaluation der Schnittstelle Notaufnahme-Rettungsdienst an einem kommunalen Krankenhaus aus der Sicht des Rettungsdienstes. Notfall Rettungsmed Suppl 1: 3
93. Lendemans S (2012): Schnittstellen in der Notfallmedizin. Am Beispiel der Schwerverletztenversorgung. Notfall Rettungsmed 15:300-304
94. Leenstra NF, Johnson A, Jung OC, Holman ND, Hofstra LS, Tulleken JE (2018): Challenges for conducting and teaching handovers as collaborative conversations: an interview study at teaching ICUs. Perspect Med Educ 7:302-310
95. Lucas B, Brammen D, Schirmeister W, Aleyt J, Kulla M, Röhrig R, Walcher F (2019): Anforderungen an eine nachhaltige Standardisierung und Digitalisierung in der klinischen Notfall- und Akutmedizin. Unfallchirurg doi.org/10.1007/s00113-019-0603-2
96. Lutzenberger T, Wutzler S, Marzi I, Walcher F (2012): Schnittstelle Rettungsdienst-Klinik: Die Übergabe im Trauma-Zentrum. Rettungsdienst 35:1154-1157
97. Machaczek K, Whietfield M, Kilner K, Allmark P (2013): Doctors and Nurses Perceptions of Barriers to Conducting Handover in Hospitals in the Czech Republic. Am J Nurs Res 1:1-9
98. Manias E, Geddes F, Watson B, Jones D, Della P (2015): Communication failures during clinical handovers lead to a poor patient outcome: Lessons learned from a case report. SAGE Open Medical Case Reports DOI: 10.1177/20503/I3XI5584859
99. Manser T (2010): Koordination und Teamarbeit in der Akutmedizin. Notfall Rettungsmed 13:357-362
100. Marung H, Wirtz S, Oppermann S, Moecke H (2011): Patientensicherheit – Wo steht der Rettungsdienst? Notarzt 27:258-265
101. May N: Miscommunication and Handover in the ED. https://www.stemlynsblog.org/chinese-whispers-miscommunication-and-handover
102. Meier F, Bauer K, Schöffski O, Schöpke T, Dormann H (2016): Zur Ökonomie ambulanter Notaufnahmepatienten. Notfall Rettungsmed 19:33-40
103. Meisel ZF, Shea JA, Peacock NJ, Dickinson ET, Paciotti B, Bhatia R, Buharin E, Cannuscio CC (2015): Optimizing the patient handoff between emergency medical services and the emergency department. Ann Emerg Med 65(3):310-317. Doi 10.1016/j.annemergmed.2014.07.003
104. Merkel MJ, Von Dossow V, Zwißler B (2017): Strukturierte Patientenübergabe in der perioperativen Medizin. Anaesthesist 66:396-403
105. Merten H, van Galen LS, Wagner C (2017): Safe handover. BMJ 359:j4328, Doi 101136/bmj.j4328
106. Messelken M, Schlechtriemen T, Arntz HR, Bohn A, Bradschetl G, Brammen D, Braun J, Gries A, Helm M, Kill C, Mochmann C, Paffrath T (2011): Der Minimale Notfalldatensatz MIND3. Notarzt 27:197-202
107. Müller M, Jürgens J, Radaelli M, Klingberg K, Hautz WE, Stock S (2018): Impact of the communication and patient hand-off tool SBAR on patient safety: a systematic review. BMJ Open 8:e022202. Doi 10.1136/bmjopen-2018-022202
108. National Clinical Effectiveness Committee (Ireland): Resource Manual & Facilitator Guide for Clinical handover: An interdisciplinary Education Programme (2017) https://www.hse.ie/eng/about/who/onmsd/safecare/clinical-handover/ressource-manual-2018.pdf
109. National Handover Protocol (2015). [www.emnow.ie/wordpress/wp-content/uploads/2015/3/National-Ambulance-Handover-Protocol.pptx](http://www.emnow.ie/wordpress/wp-content/uploads/2015/3/National-Ambulance-Handover-Protocol.pptx)
110. Nerlich M, Kerschbaum M, Ernstberger A (2017): Polytrauma-Management – präklinisches Handling und Schockraumversorgung. Notfall Rettungsmed 20:596-601
111. Nowakowski N, Fischer F (2015): Telematikanwendungen in der präklinischen Notfallmedizin in Deutschland. Notarzt 31:177-183
112. Panchal AR, Gaither JB, Svirsky I, Prosser B, Stolz U, Spaite DW (2015): The Impact of Professionalism on the Transfer of Care to the Emergency Department. J Emerg Med 49(1):18-25. Doi 10.1016/j.jemergmed.2014.12.062.
113. Parthum A, Weinzierl A (2004): Analyse von Informationsverlusten bei mündlichen Patientenübergaben – eine Pilotstudie. intensiv 12:81-86
114. Pezzolesi C, Manser T, Schifano F, Kostrzewski A, Pickles J, Harriet N, Warren I, Dhillon S (2013): Human factors in clinical handover: development and testing of a “handover performance tool” for doctors shift handovers. Intern J Health Care 25(1):58-65
115. Pezzolesi C, Schifano F, Pickles J, Dhillon S (2010): Clinical handover incident reporting in one UK general Hospital. Int J Qual Health Care 22:396-401
116. Piper D, Lea J, Woods C, Parker V (2018): The impact of patient safety culture on handover in rural health facilities. BMC Health Services Research 18:889-902
117. Plint AC, Stang SA, Calder LA (2015): Establishing research priorities for patient safety in emergency medicine: a multidisciplinary consensus panel. International Journal of Emergency Medicine 8:1-4
118. Porteous J, Stewart-Wynne EG, Conolly M, Cromellin F (2009): iSOBAR - a concept and handover checklist: the National Clinical handover Initiative. Med J Aust 190 (11Suppl:): S152
119. Pun JKH, Matthiesen CMIM, Murray KA, Slade D (2015): Factors effecting communication in emergency departments: doctors and nurses´ perception of communication in a trilingual ED in Hong Kong. International Journal of Emergency Medicine 8:48-59, DOI 10.1186/s12245-015-0095-y
120. Rall M (2013): Human Factors und CRM: Eine Einführung. In: St. Pierre M, Breuer G (Hrsg.): Simulation in der Medizin. Springer Berlin Heidelberg
121. Rall M, Lackner CK (2010): Crisis Resource Management (CRM). Notfall Rettungsmed 13:349-356
122. Reay G, Norris JM, Hayden KA, Abraham J, Yokom K, Nowell L, Lazarenk GC, Lang ES (2017): Transition in care from paramedics to emergency department nurses: a systematic review protocol. Systematic Reviews 6:260, DOI 10.1186/s13643-017-0651-z
123. Redley B, Bucknall TK, Evans S, Botti M (2016): Inter-professional clinical handover in post-anaesthetic care units: tools to improve quality and safety. Int J Qual Health Care 2016; doi: <http://dx.doi.org/10.1093/intqhc/mzw073>
124. Ries M, Christ M (2015): Qualitätsmanagement in der Notaufnahme. Med Klin Intensivmed Notfallmed 110:589-596
125. Riesenberg LA, Leitzsch J, Little BW (2009): Systematic Review of Handoff Mnemonics Literature. <https://www.researchgate.net/publication/24185457_Systematic_Review_of_Handoff_Mnemonics_Literature>
126. Roessler M, Spering C, Schmid O, Bauer M, Ross D (2017): Patientenversorgung im Schockraum – aktueller Stand. Anästh Intensivmed 58:414-428
127. Rossi R (2016): Leitfaden für Intrahospitaltransporte. Zur Vorbereitung und Durchführung von innerklinischen Patiententransfers. Springer Fachmedien Wiesbaden
128. Rossi R (2018) Notfall-Taschenbuch für den Rettungsdienst. S&K Verlag Edewecht
129. Rossi R (2019) Die Patientenübergabe: Element der Notfallversorgung oder schwaches Glied der Rettungskette? Rettungsdienst 42:236-240
130. Rüdiger-Stürchler M, Keller DI, Bingisser R (2010): Emergency Physician intershift handover – can a dINAMO checklist speed it up and improve quality? Doi.org/10.4414/smw.2010.13085
131. Sanjuan-Quiles A, Hernandez-Ramon M, Julia-Sanchis R, Garcia-Aracil N, Castejon-de la Encina MA, Perpina-Galvan J (2018): Handover of Patients From Prehospital Emergency Services to Emergency Departments. J Nurs Care 0:1-6
132. Schacher S, Glien P, Kogej M, Gräff I (2019) Strukturierte Übergabeprozesse in der Notaufnahme. Luxus oder Notwendigkeit. Notfall Rettungsmed (22:3-8)
133. Schlechtriemen T, Burghofer K, Lackner CK, Altemeyer K-H (2005): Validierung des NACA-Score anhand objektivierbarer Parameter. Notfall Rettungsmed 8:96-108
134. Schlechtriemen T, Burghofer K, Stolpe E, Altemeyer K-H, Lackner CK (2005): Der Münchner NACA-Score. Notfall Rettungsmed 8:109-111
135. Schmidt C, Ramsauer B, Witzel K (2008) Risikomanagement zur Fehlervermeidung im Krankenhaus: Standard Operating Procedures aus der Luftfahrt als Vorbild für eine strukturierte Kommunikation im Klinikalltag. Z Orthop 146:175-178
136. Schöpke T. Plappert T (2011): Kennzahlen der Notaufnahmen in Deutschland. Notfall Rettungsmed 14:371-378
137. Schröder H, Gilles L, Stieger L, Beckers S, Sopka S (2017): Patientensicherheit und Patientenübergaben in der studentischen Ausbildung der Anästhesie, Intensiv- und Notfallmedizin in Aachen. Anästh Intensivmed 58:S52
138. Schweigkofler U, Heinz SM, Hoffmann R (2018): Massenanfall von Verletzten im Krankenhaus. Konzepte, Infrastruktur und Schulung. Trauma Berufskrankh 20:171-176
139. Sefrin P (2010): Schnittstelle Notarztdienst und Notaufnahme. Notarzt 26:256-259
140. Segall N, Bonifacio AS, Schroeder RA, Barbeito A, Rogers D, Thornlow DK, Emery J, Kellum S, Wright MC, Mark JB, Durham VA (2012): Can we make postoperative patient handovers safer? A systematic review of the literature. Anesth Analg 115:102-5
141. Seifert PC (2012): Implementing AORN Recommended Practices for Transfer of Patient Care Information. AORN Journal 96:475-93. <http://dx.doi.org/10.1016/j.aorn.2012.08.011>
142. Shah Y, Alinier G, Pilay Y (2016): Clinical handover between paramedics and emergency department staff: SBAR and IMIST-AMBO acronyms. International Paramedic Practice 6(2):37-44
143. Shahid S, Thomas S (2018): Situation, Background, Assessment, Recomendation (SBAR) Communication Tool for Handoff in Health Care – A Narrative Review. https://safetyinhealth.biomedcentral.com/track/pdf/10.1186/s40886-018-0073-1
144. Sieber R (2009): Strukturierte Patientenübergabe. Star of Life 2:17-21
145. Soda H, Zegler V, Shammas L, Griewing B, Kipprich U, Keidel M, Rashid A (2017): Telemedizinische Voranmeldung in der akuten Schlaganfallversorgung. Nervenarzt 88:120-129
146. Speer T, Mühlbradt T, Fastner C, Schöfski O, Schröder O (2019): Simulationstraining als Teil des klinischen Risikomanagements. Anaesthesist doi.org/10.1007/s00-101-019-0540-z
147. St. Pierre M, Hofinger G (2014): Risikofaktor Mensch? „Human Factors“ und Fehler in der Akutmedizin. In: St. Pierre M, Hofinger G: Human Factors und Patientensicherheit in der Akutmedizin. Springer Berlin Heidelberg
148. Starmer AL, Spector MD, Stivastava R et al. (2014): Changes in medical errors after implementation of a handoff program. N Engl J Med 371:1803-12
149. Sujan MA, Chessum P, Rudd M, Fitton L, Inada-Kim M, Spurgeon P, Cooke MW (2015): Emergency Care Handover (ECHO study) across care boundaries: the need for joint decision making and consideration of psycosocial history. Emerg Med J 32:112-118
150. Sujan M, Spurgeon P, Inada-Kim M, et al. (2014): Clinical handover within the emergency care pathway and the potential risks of clinical handover failure (ECHO): primary research. Health Serv Deliv Res Doi 10.3310/ hsdr02050
151. Talbot R, Bleetman A (2007): Retention of information by emergency department staff at ambulance handover: do standardised approaches work? Emerg Med J 24:539-542. Doi 10.1136/emj.2006.045906
152. Thakore s, Morrison W (2001): A survey of the perceived quality of patient handover by ambulance staff in the resuscitation room. Emerg Med J 18:293-296
153. The Joint Commission (2007) Improving americas hospitals. The Joint Commission´s annual report on quality and safety. https://www.jointcommission.org/assets/1/6/2007_Annual_Report.pdf
154. The Joint Commission (2007): Kommunikation bei der Patientenweiterleitung. https://www.jointcommissioninternational.org/assets/3/7/PatientSolutionsGerman.pdf
155. The Joint Commission (2017): Sentinel Event Alert Inadequate hand-off communication. <https://www.jointcommission.org/assets/1/18/> SEA_58_Hand_off_Comms_9_6_17_Final_(1).pdf
156. Thelen S, Michael M, Ashmawy H, Knoefel WT, et al. (2019): Schockraummanagement bei traumatologischen Patienten. Anaesthesist 68:49-66
157. Thompson JE, Collett LW, Langbart MJ, Purcell NJ, Boyd SM, Yuminaga Y, Ossolinski G, Susanto C, McCormack A (2011): Using the ISBAR handover tool in junior medical officer handover: a study in an Australian tertiary hospital. Postgrad Med J 87:340-344
158. Toccafondi G, Albolino S, Tartaglia R (2012): The collaborative communication model for patient handover at the interface between high-acuity and low-acuity care. BMJ Qual Saf 21:i58-i66. Doi 101136.bmjqs-2012-00178
159. Trentzsch H, Urban B, Sandmeyer B, Hammer T, Strohm PC, Lazarovici M (2013): Verbessern simulatorbasierte Teamtrainings die Patientensicherheit? Unfallchirurg 116:900-908
160. Unger J (2016): SBAR: Strukturierte Patientenübergabe in der Notaufnahme. https://www.globalems.net/2016/05/10/sbar-strukturierte-patientenubergabe-in-der-notaufnahme
161. Van Rensen EL, Groen ES, Numan SC, Smit HJ, Cremer OL, Tales K, Kalkman CJ (2012): Multitasking during patient handover in the recovery room. Anesth Analg 115:1183-7
162. Vogelsang H, Botteck MN, Herzog-Niescery J, Kirov J, Litschko D, Weber TP, Gude P (2019): Übertragung einer „Cockpit-Strategie“ in die Anästhesie. Anaesthesist 68:30-38
163. Vogt L, Sopka S (2017): Patientenversorgung – aber sicher. Anaesthesist 66:393-395
164. Von Dossow V, Zwißler B (2016): DGAI Info: Strukturierte Patientenübergabe in der perioperativen Phase – Das SBAR-Konzept. Anästh Intensivmed 57:88-90
165. Von Eggins S, Slade D, Geddes F (2016): Effective Communication in Clinical Handover. Walter de Gruyter Berlin Boston Peking
166. Von Rüdern C, Bühren V, Perl M (2017): Polytraumamanagement – Behandlung des Schwerverletzten in Schockraum undOP. Z Oo
167. Walcher F, Kulla M (2011): Kerndatensatz „Notaufnahme“. DÄB 108: A626-627
168. Walcher F, Kulla M, Klinger S, Röhrig R, Wyen H, Bernhard M, Gräff I, Nienaber U, Petersen P, Himmelreich H, Schweigkofler U, Marzi I, Lefering R (2012): Standardisierte Dokumentation im Schockraum mit dem Kerndatensatz „Notaufnahme“ der DIVI. Unfallchirurg 115:457-464
169. Walton H, Munro W (2015): Improving the quality of handover by addressing handover culture and introducing a new, multi-disciplinary, team-based handover meeting. BMJ Qual Improv Report. doi:10.1136/bmjquality.u206069.w2989
170. Waßmer R, Zimmer M, Oberndörfer D, Wilken V, Ackermann H, Breitkreutz R (2011): Kann durch eine einfache Schulung das Kommunikations- und Patientenübergabe-management in der Notfallmedizin verbessert werden? Notfall Rettungsmed 14:37-44
171. Weichert O, Lenz W, Lenssen U, Kemmeries G (2013): Optimierung der Patientenversorgung durch strukturierte Anmeldung von kritisch kranken Patienten über den Rettungsdienst. Notfall Rettungsmed 16:129-134
172. Weinert M, Mayer H, Zojer E (2015): Geschulte Kommunikation als „Intervention“. Anaesthesist 64:137-144
173. Weiss M, Bernoulli L, Zollinger A (2001): Der NACA-Index. Anaesthesist 50:150-154
174. Wendt M, Fix T, Rosolski T, Holst T (2001): Wie sichern wir die medizinisch-technische Schnittstelle Rettungsdienst-Krankenhaus? Notarzt 17:S51-S54
175. Wespe M (2018): Intraoperative Patientenübergabe. Leitfaden für einen strukturierten Rapport. https://siga-fsia.ch/files/Ausbildung/Abschlussarbeiten/ Hoehere_Fachschule_Zuerich/2018_02_22_Diplomarbeit_Wespe.pdf
176. Weyrich P, Christ M, Celebi N, Riessen R (2012): Triagesysteme in der Notaufnahme. Med Klin Intensivmed Notfallmed 107:67-79
177. WHO Collaborating Centre for Patient Safety Solutions (2007): Communication During Patient Hand-Overs. [www.who.int/patientsafety/solutions/Patient-Safety-Solutions/Volume1/Solution3/May2007/PS-Solutions3.pdf](http://www.who.int/patientsafety/solutions/Patient-Safety-Solutions/Volume1/Solution3/May2007/PS-Solutions3.pdf)
178. WHO (2012): Surgical Safety Checklist: [www.who.int/patientsafety/safesurgery/ss_checklist.en](http://www.who.int/patientsafety/safesurgery/ss_checklist.en)
179. Wilk S, Siegl L, Siegl K, Hohenstein C (2018): Misskommunikation als Risikoschwerpunkt in der Patientensicherheit. Anaesthesist 67:255-263
180. Wissenschaftlicher Arbeitskreis Notfallmedizin der DGAI (2003): Rettungsdienst in Deutschland; Bestandsaufnahme und Perspektiven. Anästh Intensivmed 2003;44:354-69
181. Witzel K, Schmidt C, Ramsauer B (2008): Risikomanagement zur Fehlervermeidung im Krankenhaus: Standard Operating Procedures aus der Luftfahrt als Vorbild für eine strukturierte Kommunikation im Klinikalltag. Z Orthop Unfall 146:175-178
182. Wood K, Crouch R, Rowland E, Pope C (2013): Clinical handovers between prehospital and hospital staff: literature review. Emerg Med J doi:10.1136/emermed-2013203165
183. World Health Organization (2014): 10 Facts on patient safety. <http://www.who.int/features/factfiles/patient_safety/en/>
184. World Health Organization (2008): 10 Facts on Patient Safety. <http://who.int/features>
185. Wurmb T, Jansen H, Böttcher M, Kredel M, Wunder C, Gehrmann A, Roewer N, Muellenbach R (2014): Schockraumaufnahme schwerverletzter oder kritisch kranker Patienten. Unfallchirurg 117:242-248
186. Wurmb T, Müller T, Jansen H, Ruchholtz S, Roewer N, Kühne CA (2010): Schockraummanagement. Notarzt 45:390-397
187. Yee KC, Wong MC, Turner P (2009): “HAND ME AN ISOBAR”: a pilot study of an evidence-based approach to improving shift-to-shift clinical handover. MJA 190:S121-124
188. Yegane SAF, Sharami A, Hatamabadi HR, Hosseini-Zijoud S-F (2017): Clinical Information Transfer between EMS Staff and Emergency Medicine Assistants during Handover of Trauma Patients. Prehosp Dis Med 32:541-547
189. Yong G, Dent AW, Weiland TJ (2008): Handover from paramedics: observations and emergency medicine clinician perceptions. Emerg Med Australas 20(2):149-155. Doi 10.1111/j.1742.6723.2007.01035.x
190. Ziegler V, Rashid A, Schaff M, Kippnich U, Griewing B (2012): Qualitätsmanagement in der akuten Schlaganfallversorgung – Wie kann man die präklinisch-klinische Schnittstelle beim Schlaganfall bewerten und verbessern? Notarzt 28:237-245
191. Zimmer M, Waßmer R, Oberndörfer D, Wilken V, Latasch L, Byhahn C (2014): Patientensicherheit aus der Sicht der Rettungsassistenten. Notfall Rettungsmed 17:17-20
192. Zittlau N, Blank A (2018): Dienstübergaben in der Pflege. Heilberufe 70:11
